# Supplementary material for: Size onset of metallic behavior in neutral aluminum clusters
Source: Royal Society of Chemistry journal article supplement (doi:10.1039/d4nr02032d), 2024-01-01
Supplement: d4nr02032d1.pdf [file d4nr02032d1.pdf]

**Supporting Information for Publication:**

**Size Onset of Metallic Behavior in Neutral Aluminum Clusters**

Chase H. Rotteger<sup>1,2‡</sup>, Carter K. Jarman<sup>1,2‡</sup>, Shaun F. Sutton<sup>1,2</sup>, and Scott G. Sayres<sup>1,2,\*</sup>

1 School of Molecular Sciences, Arizona State University, Tempe, AZ 85287

2 Biodesign Center for Applied Structural Discovery, Arizona State University, Tempe, AZ 85287

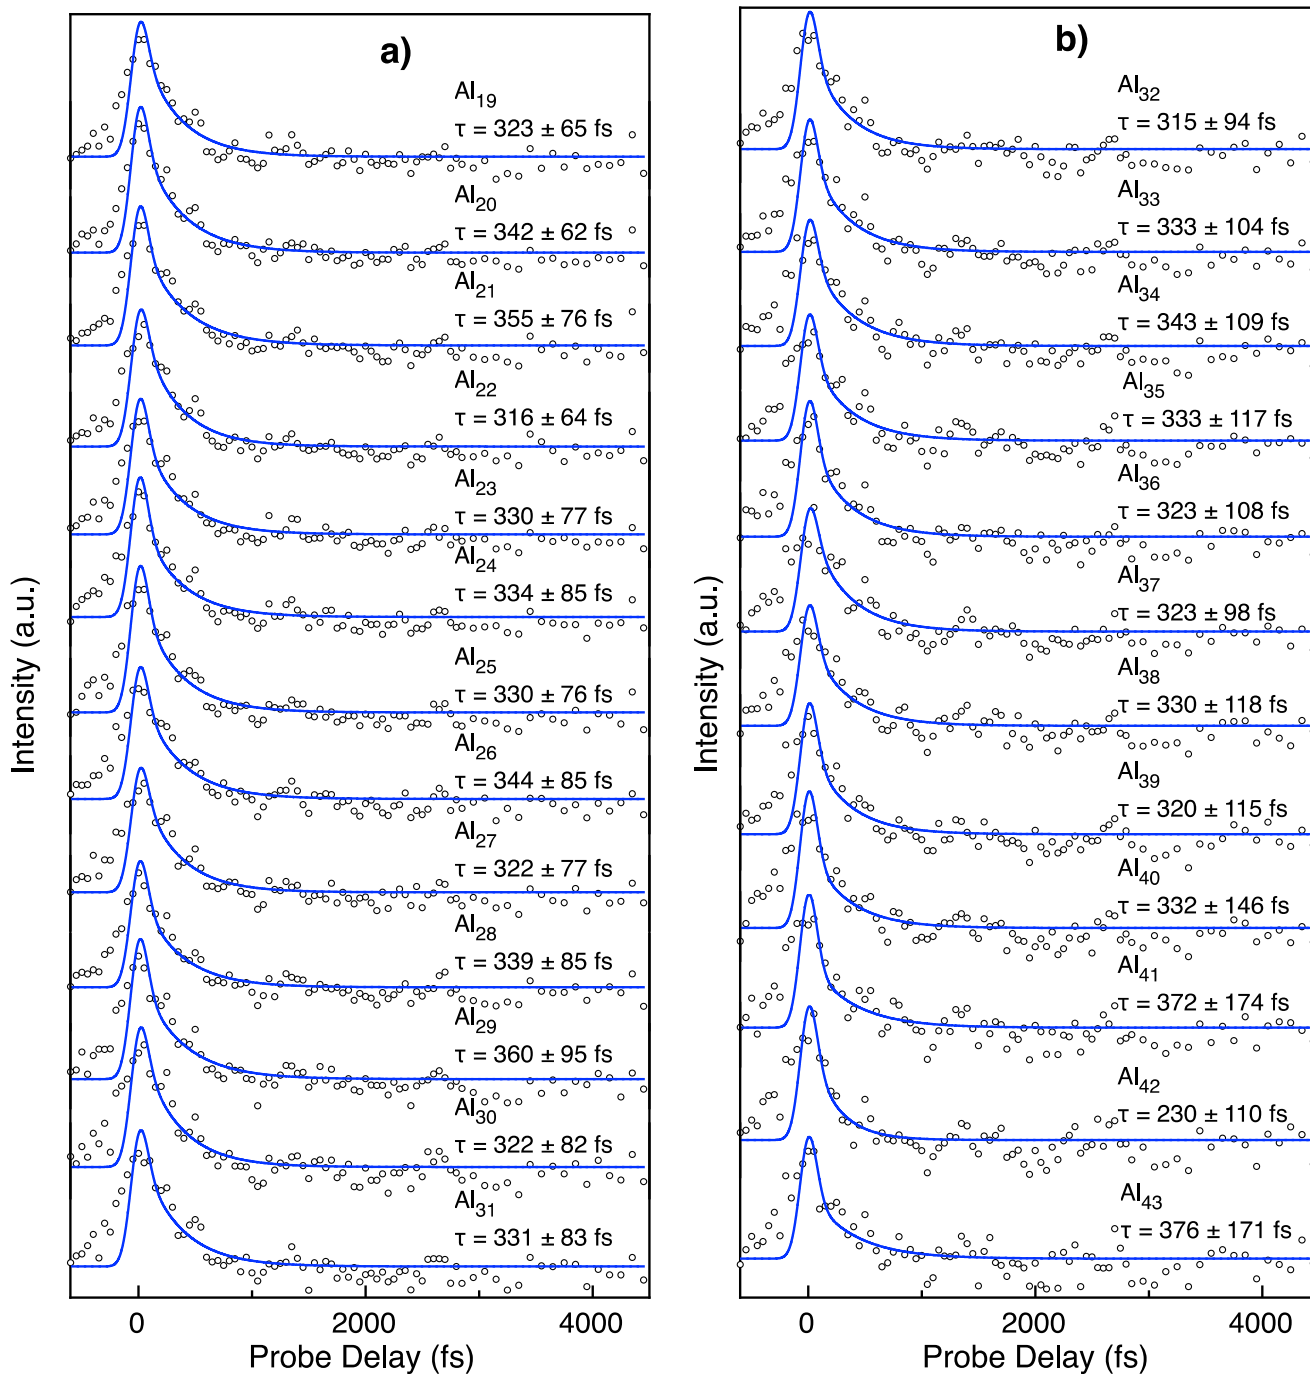

Figure S1. Experimental transient spectra recorded for the larger Al<sub>n</sub> clusters where a)  $n \in [19, 31]$  and b)  $n \in [32, 43]$ .

## Topological Excited State Calculations

We employ topological descriptors, such as  $d$  (distance between the centroids of the electron and hole densities),  $\sigma$  (average root-mean-squared-deviation of the electron and hole),  $\Lambda$  (percent overlap of the electron and hole wavefunctions), and total delocalization index (TDI) to quantify the spatial properties of the charge carrier. The transition densities for the electron and hole were determined as:

$$\rho_e(r) = \sum_{o,v} c_{o,v}^2 \phi_v^2(r), \quad (S1)$$

where  $\rho_e$  is the electron density at position  $r$ ,  $\phi$  represents the spatial wavefunction of a molecular orbital,  $c_{o,v}$  is the contribution coefficient for each pair, and the subscripts  $o$  and  $v$  stand for the occupied and virtual pairs involved in the excitation. The hole density,  $\rho_h(r)$ , is found similarly except using  $\phi_o(r)$ . The centroid of the electron density distribution is found following:

$$X_e = \int x \rho_e(r) dr, \quad (S2)$$

where  $X_e$  is the centroid position for the  $x$  value of the electron. Similar equations are used for  $y$  and  $z$  coordinates. The distance between the center of the electron and hole,  $d$ , is calculated via:

$$d = \sqrt{(d_x)^2 + (d_y)^2 + (d_z)^2}, \quad (S3)$$

where  $d_x = |X_e - X_h|$ . The  $\sigma$  values are used to characterize their distribution breadths according to:

$$\sigma = \sqrt{\int (r - R)^2 \rho(r) dr}, \quad (S4)$$

where  $R$  is the distance from the centroid value for the charge carrier. Large  $\sigma$  values indicate delocalized orbitals. The  $\Lambda$  parameter, which quantifies the degree of overlap between the wavefunctions is found following:

$$\Lambda = \frac{\sum_{o,v} c_{ov}^2 O_{ov}}{\sum_{o,v} c_{ov}^2}, \quad (S5)$$

where the spatial overlap for a given excitation can be obtained by weighting the overlap of each occupied-virtual pair by the coefficient product. Several occupied virtual pairs contribute to a given TD-DFT excitation, and the contribution coefficient of each pair,  $C_{ov}$ , is output by Gaussian16.  $O_{ov}$  is the spatial overlap between each occupied-virtual pair:

$$O_{ov} = \int |\varphi_o| |\varphi_v| dr. \quad (S6)$$

The total delocalization index (TDI) is determined as the average electron and hole delocalization indexes are related to densities as:

$$HDI = 100 \times \sqrt{\int [\rho_h(r)]^2 dr} \quad (S7)$$

$$EDI = 100 \times \sqrt{\int [\rho_e(r)]^2 dr} \quad (S8)$$

Table S1. Transient signal fitting coefficients for  $Al_n$ ,  $n = 1-43$ .  $A\tau_1$  and  $A_{\text{gauss}}$  is the amplitude of the of the exponential decay fit and Gaussian fit, respectively.

| $Al_n$ | $A\tau_1$ | $A_{\text{gauss}}$ | $A\tau_1/A_{\text{gauss}}$ | $Al_n$ | $A\tau_1$ | $A_{\text{gauss}}$ | $A\tau_1/A_{\text{gauss}}$ | $Al_n$ | $A\tau_1$ | $A_{\text{gauss}}$ | $A\tau_1/A_{\text{gauss}}$ |
|--------|-----------|--------------------|----------------------------|--------|-----------|--------------------|----------------------------|--------|-----------|--------------------|----------------------------|
| 2      | 1.945     | 2.109              | 0.922                      | 16     | 0.451     | 0.448              | 1.007                      | 30     | 0.318     | 0.204              | 1.559                      |
| 3      | 1.701     | 0.265              | 6.419                      | 17     | 0.582     | 0.509              | 1.143                      | 31     | 0.262     | 0.179              | 1.464                      |
| 4      | 0.238     | 0.1                | 2.380                      | 18     | 0.467     | 0.387              | 1.207                      | 32     | 0.24      | 0.212              | 1.132                      |
| 5      | 0.201     | 0.217              | 0.926                      | 19     | 0.54      | 0.361              | 1.496                      | 33     | 0.222     | 0.201              | 1.104                      |
| 6      | 0.156     | 0.223              | 0.700                      | 20     | 0.565     | 0.424              | 1.333                      | 34     | 0.209     | 0.176              | 1.188                      |
| 7      | 0.555     | 0.772              | 0.719                      | 21     | 0.478     | 0.369              | 1.295                      | 35     | 0.196     | 0.184              | 1.065                      |
| 8      | 0.254     | 0.355              | 0.715                      | 22     | 0.569     | 0.356              | 1.598                      | 36     | 0.194     | 0.183              | 1.060                      |
| 9      | 0.475     | 0.375              | 1.267                      | 23     | 0.497     | 0.387              | 1.284                      | 37     | 0.183     | 0.125              | 1.464                      |
| 10     | 0.652     | 0.432              | 1.509                      | 24     | 0.445     | 0.401              | 1.110                      | 38     | 0.15      | 0.138              | 1.087                      |
| 11     | 0.65      | 0.351              | 1.852                      | 25     | 0.432     | 0.343              | 1.259                      | 39     | 0.138     | 0.14               | 0.986                      |
| 12     | 0.662     | 0.371              | 1.784                      | 26     | 0.358     | 0.268              | 1.336                      | 40     | 0.11      | 0.138              | 0.797                      |
| 13     | 0.699     | 0.484              | 1.444                      | 27     | 0.38      | 0.247              | 1.538                      | 41     | 0.074     | 0.112              | 0.661                      |
| 14     | 0.931     | 0.702              | 1.326                      | 28     | 0.328     | 0.28               | 1.171                      | 42     | 0.101     | 0.095              | 1.063                      |
| 15     | 0.494     | 0.373              | 1.324                      | 29     | 0.263     | 0.228              | 1.154                      | 43     | 0.078     | 0.104              | 0.750                      |
